# Supplementary material for: Synergistic and Antagonistic Action of Phytochrome (Phy) A and PhyB during Seedling De-Etiolation in Arabidopsis thaliana
Source: MDPI journal article supplement (doi:10.3390/ijms160612199), 2015-05-28
Supplement: s1 [file s1]

# Supplementary Information

|                 |                                                                     |     |
|-----------------|---------------------------------------------------------------------|-----|
| <i>AtRBCS1A</i> | ATGGCTTCCTCTATGCTCTCTCCGCTACTATGGTTGCCTCTCCGGCTCAGGCCACTATGGTCGC    | 65  |
| <i>AtRBCS1B</i> | ATGGCTTCCTCTATGCTCTCTCTCCGCTGTGGTTACCTCCCGGGCTCAAGCCACCATGGTCGC     | 65  |
| <i>AtRBCS2B</i> | ATGGCTTCCTCTATGCTCTCTCTCCGCTGTGGTTACCTCCCGGGCTCAAGCCACCATGGTCGC     | 65  |
| <i>AtRBCS3B</i> | ATGGCTTCCTCTATGCTCTCTCTCCGCTGTGGTTACATCCCGGGCTCAGGCCACCATGGTCGC     | 65  |
| <i>AtRBCS1A</i> | TCCTTTCAACGGACTTAAGTCCTCCGCTGCCTTCCAGCCACCCGCAAGGCTAACAACGACATTA    | 130 |
| <i>AtRBCS1B</i> | TCCATTCACTGGTTTCAAGTCATCCGCTTCTTTCCCGGTACCCGCAAGGCCAACAACGACATTA    | 130 |
| <i>AtRBCS2B</i> | TCCATTCAACGGCTTCAAGTCATCCGCTTCTTTCCCGGTACCCGCAAGGCCAACAACGACATTA    | 130 |
| <i>AtRBCS3B</i> | TCCATTCAACGGCTTCAAGTCATCCGCTGCATTCCCGGTACCCGCAAGGCCAACAAGGACATCA    | 130 |
| <i>AtRBCS1A</i> | CTTCCATCAACAAGCAACGGCGGAAGAGTTAACTGCATGACAGGTGTGGCCTCCGATTGGAAAGAAG | 195 |
| <i>AtRBCS1B</i> | CTTCCATCAACAAGCAATGGGGGAAGAGTTAGCTGCATGAAGGTGTGGCCACCAATCGGAAGAAG   | 195 |
| <i>AtRBCS2B</i> | CTTCCATCAACAAGCAACGGAGGAAGAGTTAGCTGCATGAAGGTGTGGCCACCAATCGGAAGAAG   | 195 |
| <i>AtRBCS3B</i> | CTTCCATCGCAAGCAACGGGGGAAGAGTTAGCTGCATGAAGGTGTGGCCACCAATTGGAAAGAAG   | 195 |
| <i>AtRBCS1A</i> | AAGTTTGAGACTCTCTCTTACCTTCCTGACCTTACCGATTCCGAATTGGCTAAGGAAGTTGACTA   | 260 |
| <i>AtRBCS1B</i> | AAGTTTGAGACTCTCTCTTACCTTCCTGACCTTACCTGACGTCGAATTGGCTAAGGAAGTTGACTA  | 260 |
| <i>AtRBCS2B</i> | AAGTTTGAGACTCTCTCTTACCTTCCTGACCTTAGTGACGTTGAATTGGCTAAGGAAGTTGACTA   | 260 |
| <i>AtRBCS3B</i> | AAGTTTGAGACTCTCTCTTACCTTCCTGACCTTAGTGACGTCGAATTGGCTAAGGAAGTTGACTA   | 260 |
| <i>AtRBCS1A</i> | CCTTATCCGCAACAACCTGGATTCCCTGTGTTGAATTCGAGTTGAG.....CACG             | 310 |
| <i>AtRBCS1B</i> | CCTTATCCGCAACAACCTGGATTCCCTGTGTTGAATTCGAGTTGAG.....CACG             | 310 |
| <i>AtRBCS2B</i> | CCTTATCCGCAACAACCTGGATTCCCTGTGTTGAATTCGAGTTGAG.....CACG             | 310 |
| <i>AtRBCS3B</i> | CCTTATCCGCAACAACCTGGATTCCCTGTGTTGAATTCGAGTTAGAGGTAATAAACACAAACACG   | 325 |
| <i>AtRBCS1A</i> | GATTTGTGTACCGTGAGCACGGTAACCTACCCGGATACTATGATGGACGGTACTGGACAATGTGG   | 375 |
| <i>AtRBCS1B</i> | GATTTGTGTACCGTGAGCACGGTAACACTCCCGGATACTACGATGGACGGTACTGGACAATGTGG   | 375 |
| <i>AtRBCS2B</i> | GATTTGTGTACCGTGAGCACGGTAACACTCCCGGATACTATGATGGACGGTACTGGACAATGTGG   | 375 |
| <i>AtRBCS3B</i> | GATTTGTGTACCGTGAGCACGGTAACACTCCCGGATACTACGATGGACGGTACTGGACAATGTGG   | 390 |
| <i>AtRBCS1A</i> | AAGCTTCCCTTGTTTCGGTTGCACCGACTCCGCTCAAGTGTTGAAGGAAGTGAAGAGTGCAAGAA   | 440 |
| <i>AtRBCS1B</i> | AAGCTTCCATTGTTTCGGATGCACCGACTCCGCTCAAGTGTTGAAGGAAGTGAAGAATGCAAGAA   | 440 |
| <i>AtRBCS2B</i> | AAGCTTCCATTGTTTCGGATGCACCGACTCCGCTCAAGTGTTGAAGGAAGTGAAGAATGCAAGAA   | 440 |
| <i>AtRBCS3B</i> | AAGCTTCCATTGTTTCGGATGCACCGACTCCGCTCAAGTGTTGAAGGAAGTGAAGAATGCAAGAA   | 455 |
| <i>AtRBCS1A</i> | GGAGTACCCCAATGCCTTCATTAGGATCATCGGATTCGACAACACCCGTCAAGTCCAATGCATCA   | 505 |
| <i>AtRBCS1B</i> | GGAGTACCCGGGCGCCTTCATTAGGATCATCGGATTCGACAACACCCGTCAAGTCCAATGCATCA   | 505 |
| <i>AtRBCS2B</i> | GGAGTACCCCTGGCGCCTTCATTAGGATCATCGGATTCGACAACACCCGTCAAGTCCAATGCATCA  | 505 |
| <i>AtRBCS3B</i> | GGAGTACCCGGGCGCCTTCATTAGGATCATCGGATTCGACAACACCCGTCAAGTCCAATGCATCA   | 520 |
| <i>AtRBCS1A</i> | GTTTCATTGCCTACAAGCCCAAGCTTCACCGGTTAA..                              | 543 |
| <i>AtRBCS1B</i> | GTTTCATTGCCTACAAGCCCAAGCTTCACCTGATGCTTA                             | 545 |
| <i>AtRBCS2B</i> | GTTTCATTGCCTACAAGCCCAAGCTTCACCAAGCTTA                               | 545 |
| <i>AtRBCS3B</i> | GTTTCATTGCCTACAAGCCCAAGCTTCACCAAGCTTA                               | 560 |

**Figure S1.** Multiple alignment of four *RBCS* gene sequences in *Arabidopsis thaliana*. Highlight homology level: 100%, black;  $\geq 75\%$ , pink;  $\geq 50\%$ , light blue; no homolog, white.

**Table S1.** Primers used in this study.

| Gene ID                     | Primers (5' to 3')             | Purpose                    |
|-----------------------------|--------------------------------|----------------------------|
| <i>RBCS1A</i> (At1g67090)   | CACAAAGAGTAAAGAAGAACAATGGC     | Forward primer for RT-PCR  |
|                             | AGATGGGGGATAAAGTTTTGAGG        | Reverse primer for RT-PCR  |
|                             | AATTTCCGGACTTAACGTTTGTTT       | Forward primer for qRT-PCR |
|                             | CATCAGACAGTTGAGAATCCGATAGA     | Reverse primer for qRT-PCR |
| <i>RBCS1B</i> (At5g38430)   | GGCAAAAGAAGAAGAAGAAGAAG        | Forward primer for RT-PCR  |
|                             | CCTTCAGTTTTTTTCACTTTGGCA       | Reverse primer for RT-PCR  |
|                             | GCCAAAGTGAAAAAACTGAAGGTT       | Forward primer for qRT-PCR |
|                             | AAGAGCAGAAATGAAGTGATATGAATAGA  | Reverse primer for qRT-PCR |
| <i>RBCS2B</i> (At5g38420)   | ACAAACAAGTAAGTAAGAGAAAAACC     | Forward primer for RT-PCR  |
|                             | ATAGTTCCTCAACTGTTAAGTCGGC      | Reverse primer for RT-PCR  |
|                             | ACCCATTTCTATGTGGTCAATGC        | Forward primer for qRT-PCR |
|                             | TTCACTTTCAAACAATAGTTCCTCAAC    | Reverse primer for qRT-PCR |
| <i>RBCS3B</i> (At5g38410)   | CACCAGTAGGAAAACAAGTCAGTAAG     | Forward primer for RT-PCR  |
|                             | CAGACAATAGGAAATGAAATGAGCAGAG   | Reverse primer for RT-PCR  |
|                             | CCTATTGTCTGTGTTCTTTTTCTCTTTATG | Forward primer for qRT-PCR |
|                             | TCAAGACGCACGGATATATAAATTACA    | Reverse primer for qRT-PCR |
| <i>PHYA</i> (At1g09570)     | GCAATCGGGAAGCATTTCCTC          | Forward primer for qRT-PCR |
|                             | CATCAGCCCTGGACAGATGTG          | Reverse primer for qRT-PCR |
| <i>PHYB</i> (At2g18790)     | GCAAATGGCTGATGGATTCG           | Forward primer for qRT-PCR |
|                             | CACTAGCAGTTGACAATGGTCG         | Reverse primer for qRT-PCR |
| <i>HY5</i> (At5g11260)      | GCTGCAAGCTCTTTACCATC           | Forward primer for qRT-PCR |
|                             | AGCATCTGGTCTCGTTCTG            | Reverse primer for qRT-PCR |
| <i>ACTIN2</i> (At3g18780)   | GACCAGCTCTTCCATCGAGAA          | Forward primer for qRT-PCR |
|                             | CAAACGAGGGCTGGAACAAG           | Reverse primer for qRT-PCR |
| <i>18S rRNA</i> (At2g01010) | CCTTTCTCTCTTTCCATTGCGTT        | Forward primer for RT-PCR  |
|                             | TGTTATTTATTGTCACTACCTCC        | Reverse primer for RT-PCR  |
|                             | AATTGTTGGTCTTCAACGAGGAA        | Forward primer for qRT-PCR |
|                             | AAAGGGCAGGGACGTAGTCAA          | Reverse primer for qRT-PCR |
